# Supplementary material for: Tuning solvent co-ordination in Cs2SnI6 perovskite solution via the co-solvent dilution strategy for energy-efficient broadband photodetector arrays
Source: Royal Society of Chemistry journal article supplement (doi:10.1039/d4ta02072c), 2024-01-01
Supplement: d4ta02072c1.pdf [file d4ta02072c1.pdf]

## Supporting Information

# Tuning Solvent Co-ordination in Cs<sub>2</sub>SnI<sub>6</sub> Perovskite Solution via Co-Solvent Dilution Strategy for Energy-Efficient Broadband Photodetector Arrays

Saqib Nawaz Khan<sup>a,b</sup>, Huili Liang<sup>a,b\*</sup>, Wang Yan<sup>c</sup>, Xiaolong Du<sup>a,b</sup>, Zengxia Mei<sup>a,b\*</sup>

<sup>a</sup> Institute of Physics, University of Chinese Academy of Sciences, Beijing 100190, China

<sup>b</sup> Songshan Lake Materials Laboratory, Dongguan 523808, China

<sup>c</sup> Beijing Hairou Laboratory, Beijing 101400, China

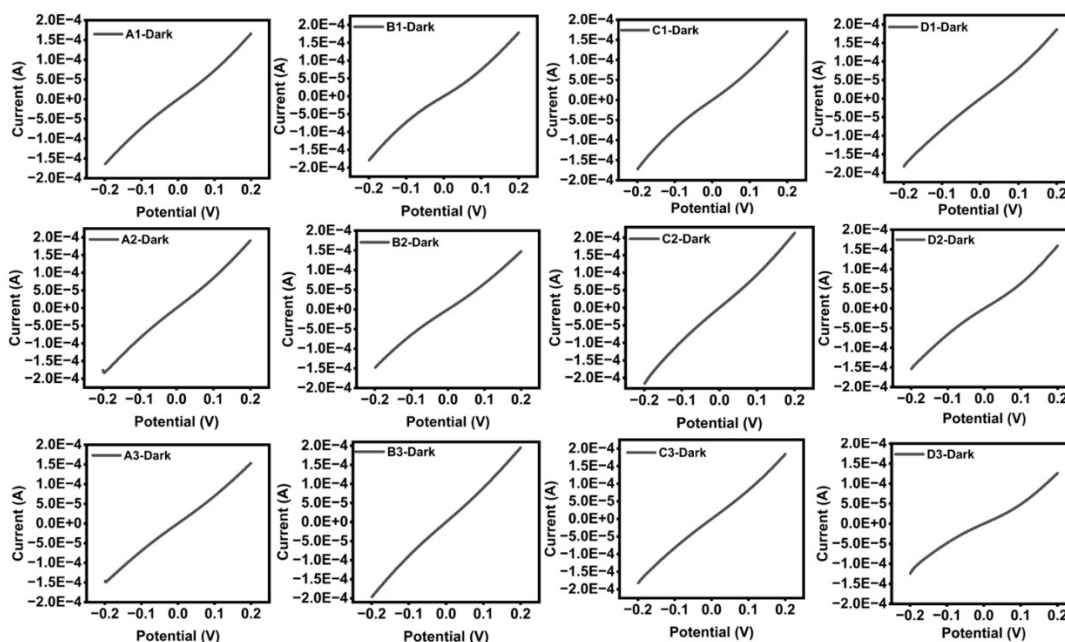

**Figure S1.** I-V dark curves of 4×3 Cs<sub>2</sub>SnI<sub>6</sub> PD arrays biased from -0.2 V and 0.2 V.

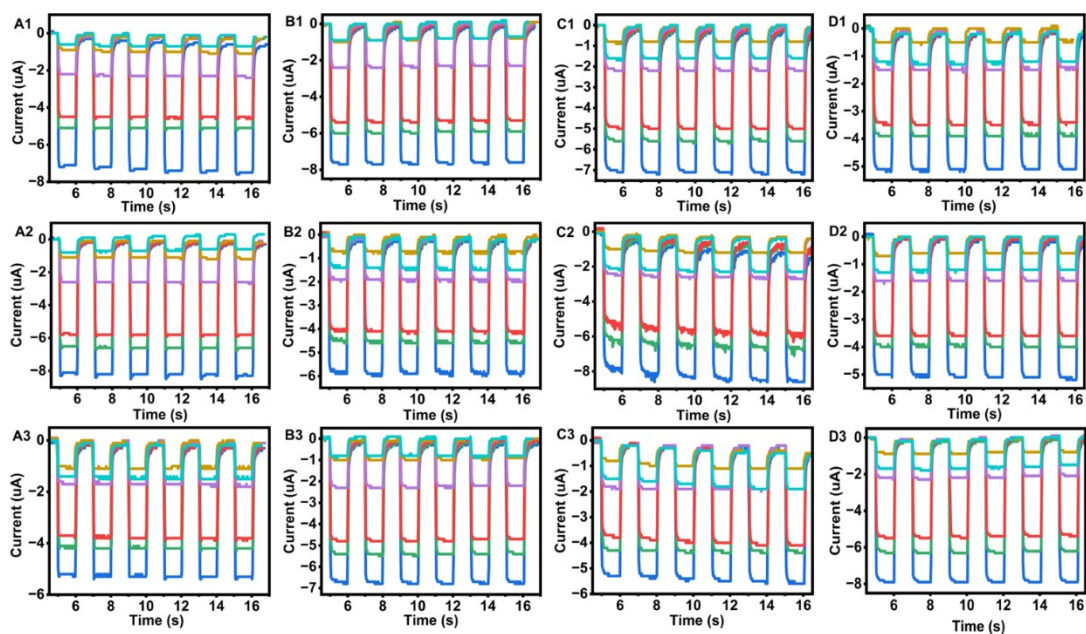

**Figure S2.** Dynamic photo response of  $4 \times 3$   $\text{Cs}_2\text{SnI}_6$  photodetector arrays under illumination ranging from Vis to NIR.

**Table S1.** Rise-fall time of  $\text{Cs}_2\text{SnI}_6$  PD prepared with 19 vol% D-water dilution under illumination ranging from Vis to NIR.

| Wavelength (nm) | Rise Time (s) | Fall Time (s) |
|-----------------|---------------|---------------|
| 470             | 0.045         | 0.072         |
| 550             | 0.085         | 0.072         |
| 650             | 0.045         | 0.045         |
| 780             | 0.045         | 0.070         |
| 850             | 0.035         | 0.070         |
| 890             | 0.063         | 0.070         |

**Table S2.** The average photoelectric values derived from 12 devices prepared with 19 vol% D-water dilution under bias voltage  $-0.1\text{V}$  and illumination ranging from 470 to 890 nm.

| Wavelength/Electrical parameters          | 470nm | 550nm | 650nm | 780nm | 850nm | 890nm |
|-------------------------------------------|-------|-------|-------|-------|-------|-------|
| Responsivity (A/W)                        | 2.46  | 3.54  | 4.46  | 4.13  | 2.79  | 0.81  |
| Detectivity ( $10^{10}$ Jones)            | 1.96  | 2.81  | 3.49  | 3.28  | 2.23  | 0.69  |
| Net-Photocurrent ( $\mu$ A)               | 6.07  | 4.77  | 4.22  | 1.85  | 0.74  | 1.16  |
| Incident power intensity of light (mW/cm) | 1.64  | 0.897 | 0.630 | 0.299 | 0.175 | 0.900 |

**Table S3.** Summary of Cs<sub>2</sub>SnI<sub>6</sub> perovskite-based photodetectors.

| Process                 | Key strategy                              | Bias voltage | Responsivity A/W | Detectivity (Jones)   | T <sub>r</sub> /T <sub>f</sub> | Ref          |
|-------------------------|-------------------------------------------|--------------|------------------|-----------------------|--------------------------------|--------------|
| Spin coating            | Co-solvent strategy                       | -0.1 V       | 5.5              | $5.51 \times 10^{10}$ | 0.045s /0.045s                 | Present work |
| Spin coating            | Stoichiometry, and annealing optimization | 1V           | 0.006            | $2 \times 10^9$       | -                              | 1            |
| Spin coating            | Polyethylene glycol dimethacrylate        | 1V           | 3.5              | $6 \times 10^{10}$    | -                              | 2            |
| Spin coating            | Precursor-compensation strategy           | 0V           | 0.00107          | $6.03 \times 10^{10}$ | 0.59s /1.90s                   | 3            |
| Hydrothermal            | Longer processing time (>11 hours)        | 5V           | 11.96            | $1.21 \times 10^{11}$ | 16ms /22ms                     | 4            |
| Hot injection           | Solvent engineering                       | -5V          | 0.12             | $10^{13}$             | 2s/25s                         | 5            |
| Hot injection           | Perovskite/ZnO heterojunction             | 15V          | 0.1834           | $1.39 \times 10^{12}$ | 4.3 $\mu$ s /5.3 $\mu$ s       | 6            |
| Liquid-liquid interface | Ni doping                                 | 1V           | 1634             | $4.52 \times 10^{12}$ | 150ms /390ms                   | 7            |
|                         | Zn doping                                 | 1V           | 710              | $1.56 \times 10^{13}$ | 320ms /830ms                   |              |

## References

1. Krishnaiah, M.; Khan, M. M. I.; Kumar, A.; Jin, S. H., Impact of CsI

concentration, relative humidity, and annealing temperature on lead-free Cs<sub>2</sub>SnI<sub>6</sub> perovskites: Toward visible light photodetectors application. *Materials Letters* **2020**, *269*, 127675.

2. Na, H.-J.; Lee, S.-E.; Lee, E. G.; Lee, J. H.; Gong, Y. J.; Kim, H.; Cho, N.-K.; Kim, Y. S., Nanometer-Thick Cs<sub>2</sub>SnI<sub>6</sub> Perovskite–Polyethylene Glycol Dimethacrylate Composite Films for Highly Stable Broad-Band Photodetectors. *ACS Applied Nano Materials* **2021**, *4* (5), 5309-5318.

3. Huang, J.; Dong, C.; Mei, Y.; Lu, X.; Yue, G.; Gao, Y.; Liu, R.; Zhang, W.; Tan, F., The precursor-compensation strategy boosts the photoresponse performance of air-stable, self-powered Cs<sub>2</sub>SnI<sub>6</sub> photodetectors. *Journal of Materials Chemistry C* **2021**, *9* (40), 14217-14225.

4. Krishnaiah, M.; Kim, S.; Kumar, A.; Mishra, D.; Seo, S. G.; Jin, S. H., Physically Detachable and Operationally Stable Cs<sub>2</sub>SnI<sub>6</sub> Photodetector Arrays Integrated with  $\mu$ -LEDs for Broadband Flexible Optical Systems. *Advanced Materials* **2022**, *34* (17), 2109673.

5. Ghosh, S.; Paul, S.; De, S. K., Control Synthesis of Air-Stable Morphology Tunable Pb-Free Cs<sub>2</sub>SnI<sub>6</sub> Perovskite Nanoparticles and Their Photodetection Properties. *Particle & Particle Systems Characterization* **2018**, *35* (9), 1800199.

6. Shao, D.; Zhu, W.; Xin, G.; Liu, X.; Wang, T.; Shi, S.; Lian, J.; Sawyer, S., A high performance UV–visible dual-band photodetector based on an inorganic Cs<sub>2</sub>SnI<sub>6</sub> perovskite/ZnO heterojunction structure. *Journal of Materials Chemistry C* **2020**, *8* (5), 1819-1825.

7. Shen, J.; Zhu, W.; Lian, Z.; Lin, A.; Shi, S.-F.; Yang, K.; Li, M.; Zhao, D.; Sun, Y.-Y.; Lian, J., Metal Ion-Incorporated Lead-Free Perovskites toward Broadband Photodetectors. *ACS Applied Electronic Materials* **2023**, *5* (10), 5291-5302.
